# Supplementary material for: Biochar production and applications in soil fertility and carbon sequestration – a sustainable solution to crop-residue burning in India
Source: Royal Society of Chemistry journal article supplement (doi:10.1039/c7ra10353k), 2018-01-01
Supplement: c7ra10353k1.pdf [file c7ra10353k1.pdf]

## Supplementary Material

### Biochar Production and Applications in Soil Fertility and Carbon Sequestration-A sustainable solution to Crop- Residue Burning in India

Dinesh Mohan,<sup>1\*</sup> Kumar Abhishek,<sup>1</sup> Ankur Sarswat,<sup>1</sup> Manvendra Patel,<sup>1</sup>  
Prachi Singh<sup>1</sup> and Charles U. Pittman Jr.<sup>2</sup>

<sup>1</sup>School of Environmental Sciences  
Jawaharlal Nehru University  
New Delhi 110067, India  
Email: dm\_1967@hotmail.com

Phone: 0091-11-26704616

FAX: 0091-11-26704616

<sup>2</sup>Department of Chemistry  
Mississippi State University,  
Mississippi State, MS 39762, USA  
<sup>1</sup>School of Environmental Sciences

**Table SM1. Amendments used in incubation experiments**

| <b>S. No</b> | <b>Soil amendments with</b> | <b>Code</b>        | <b>Amount of biochar used (g)</b> | <b>Ratio [%wt/wt]</b> |
|--------------|-----------------------------|--------------------|-----------------------------------|-----------------------|
| 1            | Rice husk biochar           | Soil +RHBC (0.5%)  | 2.5                               | 0.5                   |
| 2            | Rice husk biochar           | Soil +RHBC (1.5%)  | 7.5                               | 1.5                   |
| 3            | Rice husk biochar           | Soil +RHBC (3.0%)  | 15.0                              | 3.0                   |
| 4            | Rice husk biomass           | Soil +RHBM (0.5%)  | 2.5                               | 0.5                   |
| 5            | Rice husk biomass           | Soil +RHBM (1.5%)  | 7.5                               | 1.5                   |
| 6            | Rice husk biomass           | Soil +RHBM (3.0%)  | 15.0                              | 3.0                   |
| 7            | Corn stover biochar         | Soil + CSBC (0.5%) | 2.5                               | 0.5                   |
| 8            | Corn stover biochar         | Soil + CSBC (1.5%) | 7.5                               | 1.5                   |
| 9            | Corn stover biochar         | Soil + CSBC (3.0%) | 15.0                              | 3.0                   |
| 10           | Corn stover biomass         | Soil + CSBM (0.5%) | 2.5                               | 0.5                   |
| 11           | Corn stover biomass         | Soil + CSBM (1.5%) | 7.5                               | 1.5                   |
| 12           | Corn stover biomass         | Soil + CSBM (3.0%) | 15.0                              | 3.0                   |
| 13           | Soil (Control)              | -                  | -                                 | -                     |

**Table SM2: EDXRF of Corn stover biochar (CSBC) and Rice husk biochar (RHBC)\***

| S. No. | Compounds                      | Unit | Corn stover biochar | Rice husk biochar |
|--------|--------------------------------|------|---------------------|-------------------|
| 1.     | Na <sub>2</sub> O              | ppm  | 1153.17             | -                 |
| 2.     | Cl                             | ppm  | 567.10              | 588.38            |
| 3.     | MnO                            | ppm  | 124.28              | 250.69            |
| 4.     | Fe <sub>2</sub> O <sub>3</sub> | ppm  | 402.13              | 600.63            |
| 5.     | CuO                            | ppm  | 35.52               | 22.08             |
| 6.     | ZnO                            | ppm  | 26.09               | 32.43             |
| 7.     | TiO <sub>2</sub>               | ppm  | 47.71               | 70.85             |
| 8.     | MgO                            | % wt | 2.50                | 0.42              |
| 9.     | SiO <sub>2</sub>               | % wt | 3.12                | 48.87             |
| 10.    | P <sub>2</sub> O <sub>5</sub>  | % wt | 1.02                | -                 |
| 10.    | SO <sub>3</sub>                | % wt | 0.30                | 0.21              |

\* To maintain uniformity, a number (n=5) of biochar samples were randomly picked from thoroughly mixed (using Quadrate method) bulk biochar. These samples were then mixed well again using quadrate method at least 10 times. Then a small sample size is picked for analysis.

**Table SM3: Weekly plant height (cm) influenced by biochar application amounts**

| Amount of CSBC in soil (Wt. %)        | Growth (cm) at the end of each week* |                 |                 |                 |                 |                 |                 |
|---------------------------------------|--------------------------------------|-----------------|-----------------|-----------------|-----------------|-----------------|-----------------|
|                                       | 1 <sup>st</sup>                      | 2 <sup>nd</sup> | 3 <sup>rd</sup> | 4 <sup>th</sup> | 5 <sup>th</sup> | 6 <sup>th</sup> | 7 <sup>th</sup> |
| <b>0.0</b>                            | 6.0 ± 0.6                            | 6.0 ± 0.6       | 7.2 ± 0.5       | 7.4 ± 0.6       | 8.3 ± 0.5       | 9.0 ± 0.6       | 9.5 ± 0.7       |
| <b>0.5</b>                            | 7.3 ± 0.5                            | 7.8 ± 0.5       | 10.7 ± 1.6      | 12.0 ± 1.7      | 13.7 ± 0.9      | 16.3 ± 1.6      | 17.0 ± 1.5      |
| <b>1.5</b>                            | 7.3 ± 1.7                            | 9.7 ± 0.8       | 11.5 ± 1.3      | 13.3 ± 2.8      | 13.7 ± 3.3      | 15.7 ± 5.3      | 16.5 ± 5.7      |
| <b>3.0</b>                            | 8.3 ± 1.5                            | 8.7 ± 1.3       | 9.9 ± 2.9       | 10.4 ± 3.5      | 11.9 ± 5.2      | 12.4 ± 5.0      | 20.0 ± 5.9      |
| <b>Amount of RHBC in soil (Wt. %)</b> |                                      |                 |                 |                 |                 |                 |                 |
| <b>0.0</b>                            | 6.0 ± 0.6                            | 6.0 ± 0.6       | 7.2 ± 0.5       | 7.4 ± 0.6       | 8.3 ± 0.5       | 9.0 ± 0.6       | 9.5 ± 0.7       |
| <b>0.5</b>                            | 7.7 ± 1.1                            | 8.5 ± 1.2       | 9.5 ± 1.4       | 10.0 ± 1.4      | 10.6 ± 0.8      | 11.7 ± 1.5      | 11.8 ± 1.6      |
| <b>1.5</b>                            | 7.3 ± 2.8                            | 8.2 ± 2.9       | 10.0 ± 3.4      | 11.2 ± 3.8      | 13.2 ± 4.6      | 14.3 ± 4.8      | 18.2 ± 6.4      |
| <b>3.0</b>                            | 7.5 ± 1.3                            | 8.6 ± 1.3       | 10.9 ± 1.6      | 12.6 ± 1.3      | 14.4 ± 2.3      | 15.8 ± 2.8      | 16.2 ± 2.8      |

\*The data represents are the mean value from three replicates measurements ± standard deviations.

**Table SM4: Number of leaves per plant versus time as influenced by biochar application amounts**

| Amount of CSBC in soil<br>(Wt. %) | Number of leaves at the end of each week** |                 |                 |                 |                 |                 |                 |
|-----------------------------------|--------------------------------------------|-----------------|-----------------|-----------------|-----------------|-----------------|-----------------|
|                                   | 1 <sup>st</sup>                            | 2 <sup>nd</sup> | 3 <sup>rd</sup> | 4 <sup>th</sup> | 5 <sup>th</sup> | 6 <sup>th</sup> | 7 <sup>th</sup> |
| <b>0</b>                          | 4.0 ± 0.6                                  | 4.0 ± 0.1       | 4.0 ± 0.6       | 4.0 ± 0.5       | 5.0 ± 0.9       | 6.0 ± 1.2       | 7.0 ± 1.6       |
| <b>0.5</b>                        | 4.0 ± 0.6                                  | 3.0 ± 0.6       | 4.0 ± 0.6       | 5.0 ± 0.1       | 6.0 ± 0.6       | 6.0 ± 1.1       | 7.0 ± 1.7       |
| <b>1.5</b>                        | 5.0 ± 1.6                                  | 4.0 ± 1.3       | 5.0 ± 1.7       | 6.0 ± 1.9       | 6.0 ± 1.8       | 6.0 ± 1.9       | 7.0 ± 1.9       |
| <b>3.0</b>                        | 4.0 ± 1.1                                  | 4.0 ± 0.6       | 5.0 ± 0.1       | 6.0 ± 0.6       | 6.0 ± 0.6       | 6.0 ± 1.0       | 8.0 ± 0.6       |
| Amount of RHBC in soil<br>(Wt. %) |                                            |                 |                 |                 |                 |                 |                 |
| <b>0</b>                          | 4.0 ± 0.6                                  | 4.0 ± 0.1       | 4.0 ± 0.6       | 4.0 ± 0.5       | 5.0 ± 0.9       | 6.0 ± 1.2       | 7.0 ± 1.6       |
| <b>0.5</b>                        | 4.0 ± 0.1                                  | 4.0 ± 0.6       | 4.0 ± 0.7       | 4.0 ± 0.1       | 5.0 ± 0.1       | 6.0 ± 0.1       | 6.0 ± 0.1       |
| <b>1.5</b>                        | 5.0 ± 0.2                                  | 4.0 ± 0.6       | 5.0 ± 0.6       | 6.0 ± 0.7       | 7.0 ± 1.2       | 6.0 ± 2.1       | 6.0 ± 2.1       |
| <b>3.0</b>                        | 4.0 ± 0.2                                  | 4.0 ± 0.6       | 5.0 ± 1.6       | 6.0 ± 1.9       | 7.0 ± 0.6       | 7.0 ± 1.7       | 7.0 ± 2.6       |

\*\*The data represents are the mean value from three replicate measurements ± standard deviations.

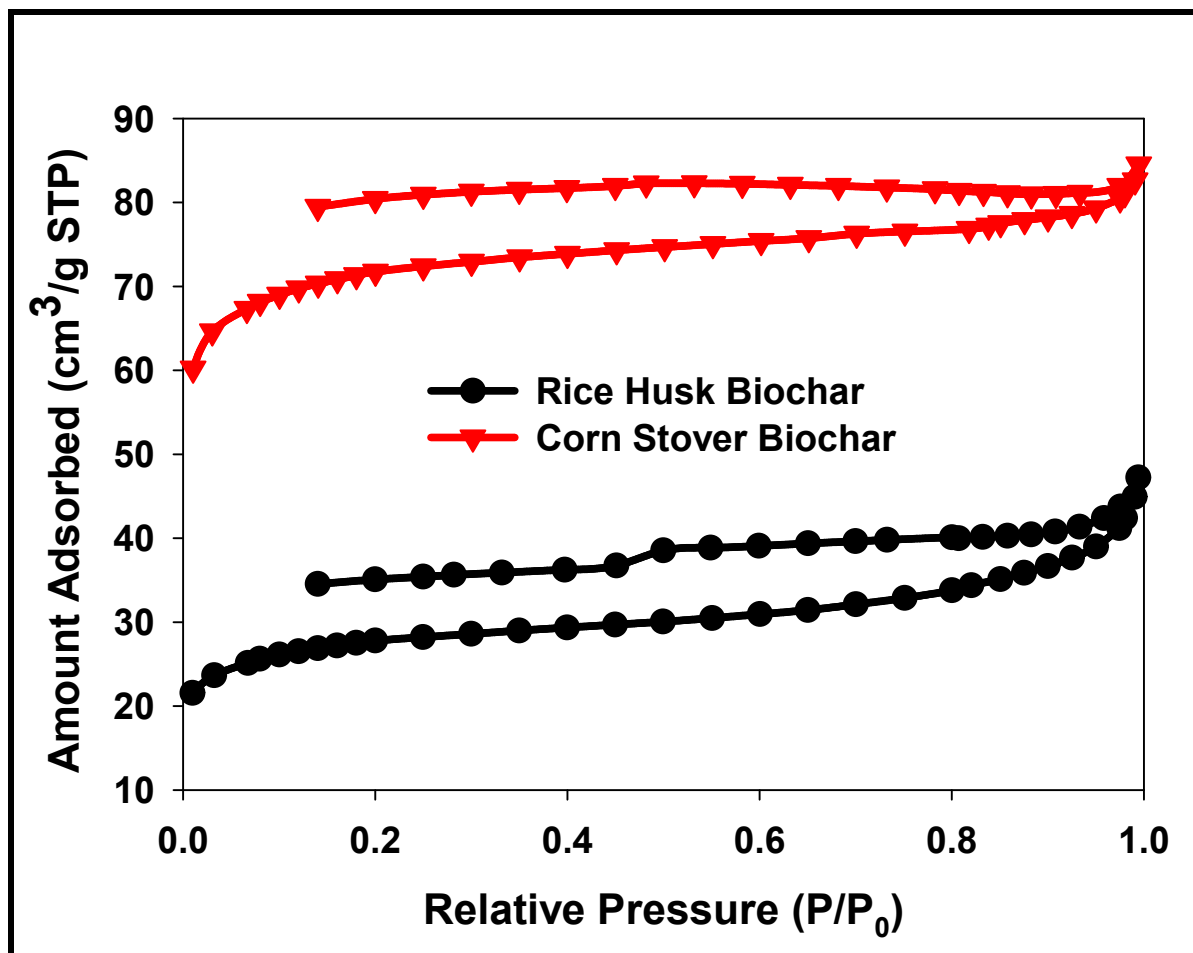

Figure SM1. BET adsorption isotherms

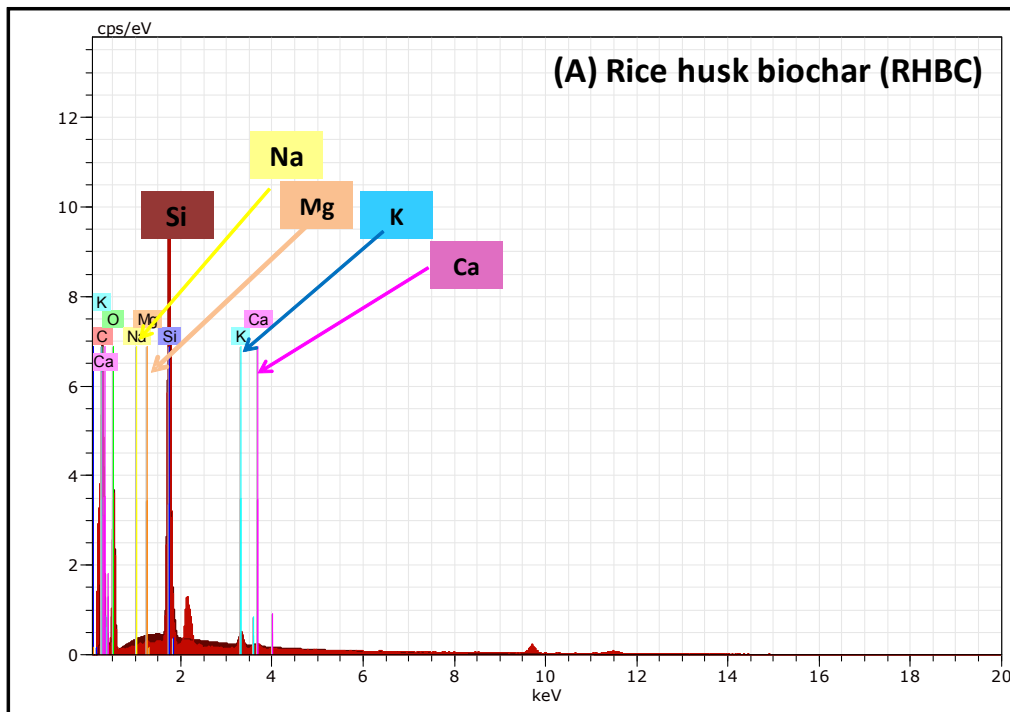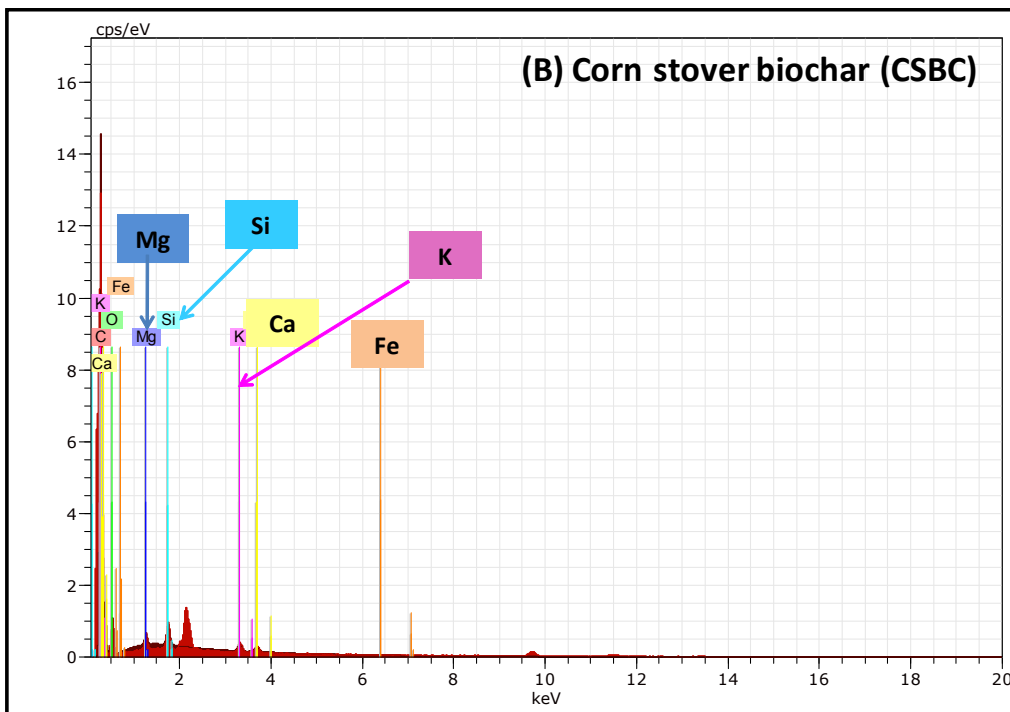

Figure SM2. EDX spectra of (A) rice husk biochar (RHBC) and (B) corn stover biochar (CSBC).
